# Supplementary material for: Insulin Regulates Adrenal Steroidogenesis by Stabilizing SF-1 Activity
Source: PubMed Central journal article supplement (PMC5864882; doi:10.1038/s41598-018-23298-2), 2018-03-22

**Insulin Regulates Adrenal Steroidogenesis by Stabilizing SF-1 Activity**

Ann W. Kinyua<sup>1</sup>, Khanh V. Doan<sup>1,4</sup>, Dong Joo Yang<sup>1,2</sup>, My Khanh Q. Huynh<sup>1</sup>, Yun-Hee Choi<sup>3</sup>,  
Dong Min Shin<sup>2</sup>, and Ki Woo Kim<sup>1,2\*</sup>

<sup>1</sup>Departments of Pharmacology and Global Medical Science, Wonju College of Medicine,  
Yonsei University, Wonju, 26426, Korea.

<sup>2</sup>Department of Oral Biology, BK21 PLUS, Yonsei University College of Dentistry, Seoul,  
03722, Korea

<sup>3</sup>Anti-aging Research Institute of BIO-FD&C Co. Ltd., Incheon, 21990, Korea.

<sup>4</sup>Present address: Department of Pharmacology, Tan Tao University, School of Medicine, Tan  
Tao University Avenue Tan Duc E. City, Duc Hoa, Long An, 850000, Vietnam

**\*Correspondence and requests for reprints, materials should be addressed to:**

Ki Woo Kim ([kiwoo@yonsei.ac.kr](mailto:kiwoo@yonsei.ac.kr) or [iamkiwoo@gmail.com](mailto:iamkiwoo@gmail.com)): +82-10-9899-8489 office

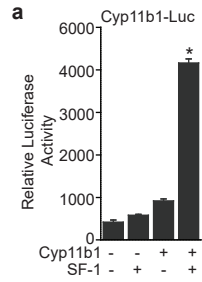

Supplementary Figure S1. Effect of SF-1 on Cyp11b1-luciferase activity (a).

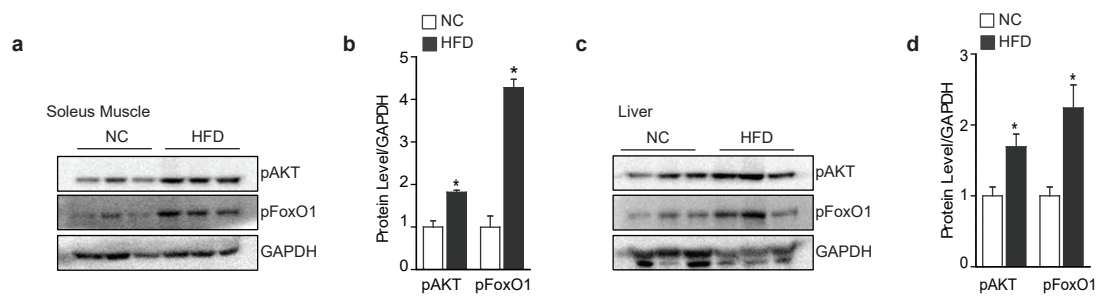

Supplementary Figure S2. Relative phosphorylation levels of AKT and FoxO1 in soleus muscle (a and b) and liver (c and d) from male mice. The values are mean  $\pm$ SEM (\* $p$ <0.05, Student's test).

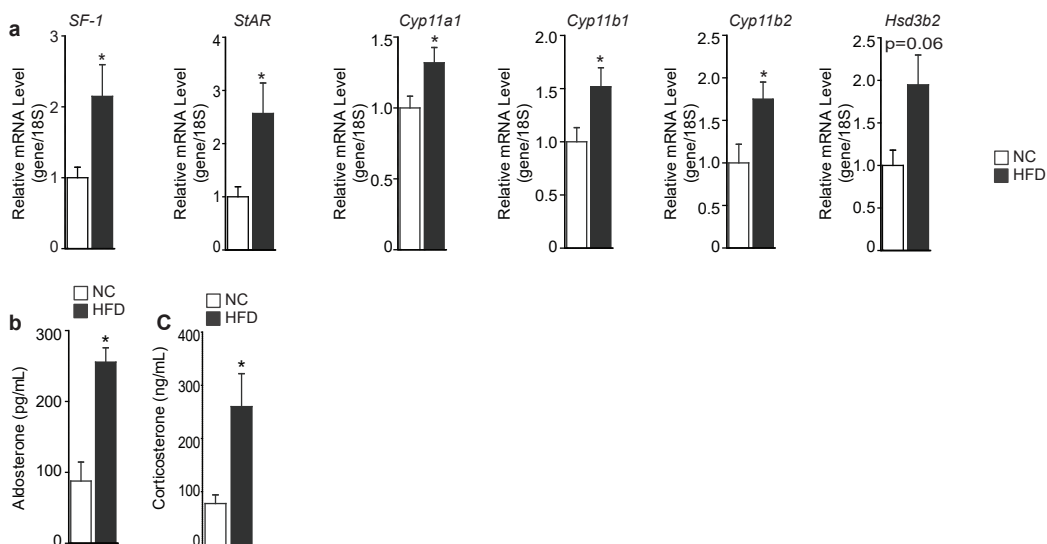

Supplementary Figure S3. mRNA expression of indicated steroidogenic genes from the adrenal gland (a). Plasma aldosterone (b) and corticosterone (c) levels. All samples from female mice. The values are mean  $\pm$ SEM (\* $p$ <0.05, Student's test).

# Full-gel blots

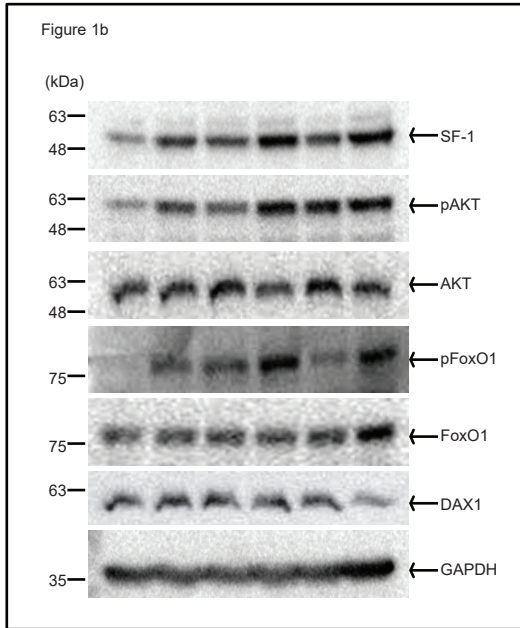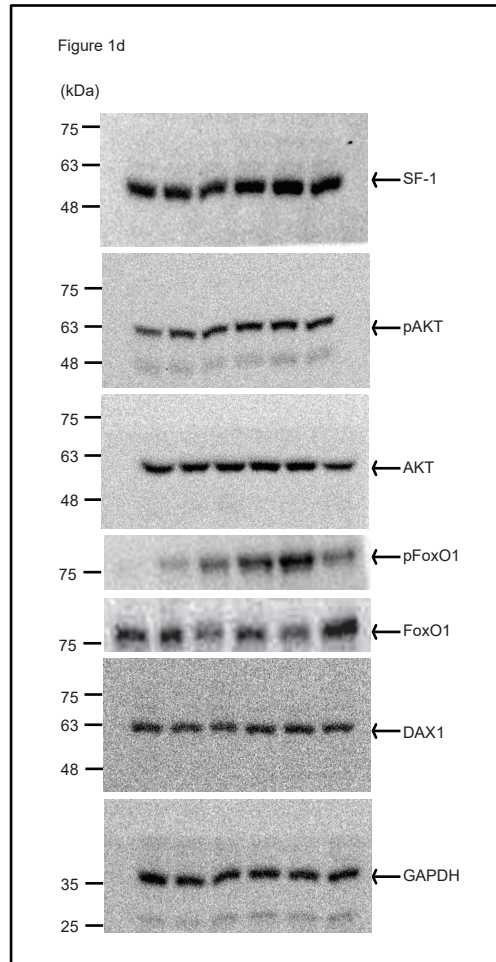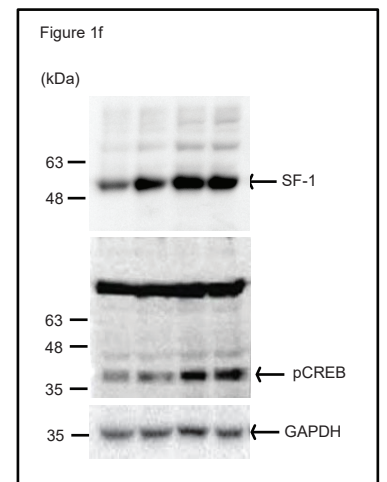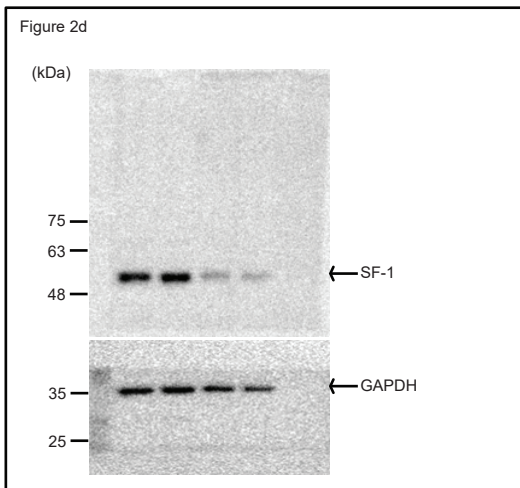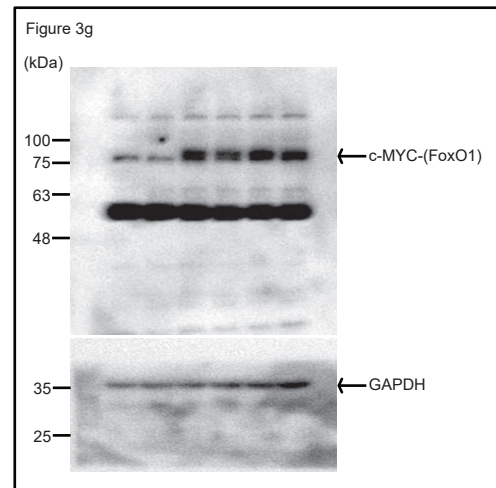

# Full gel-blots

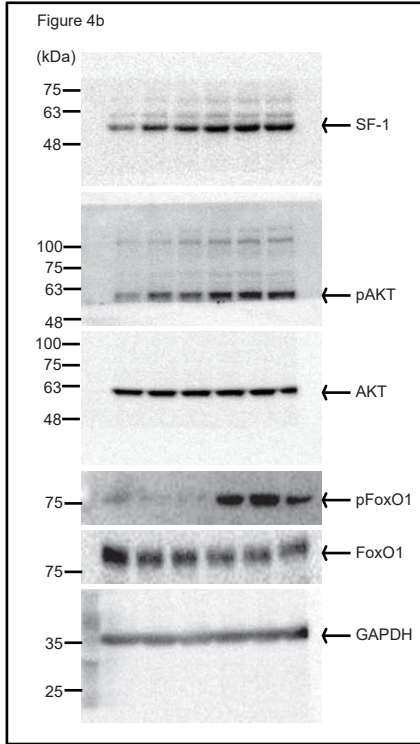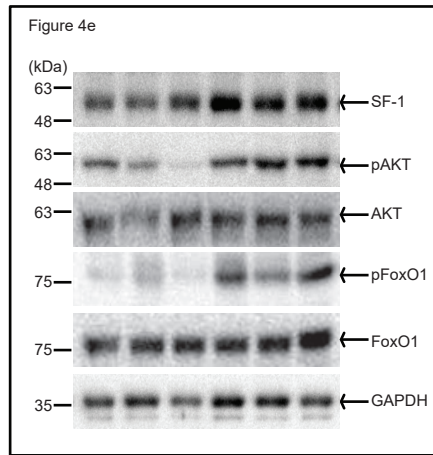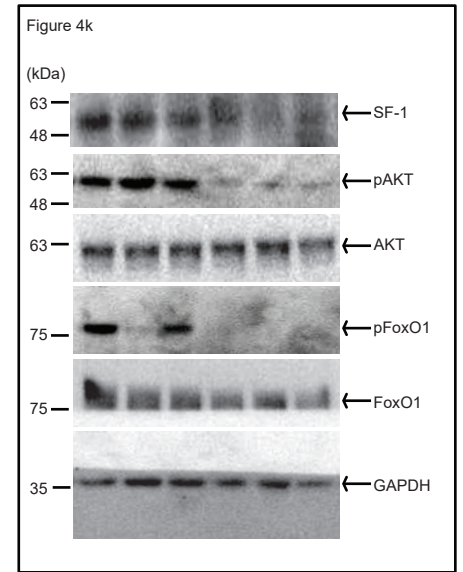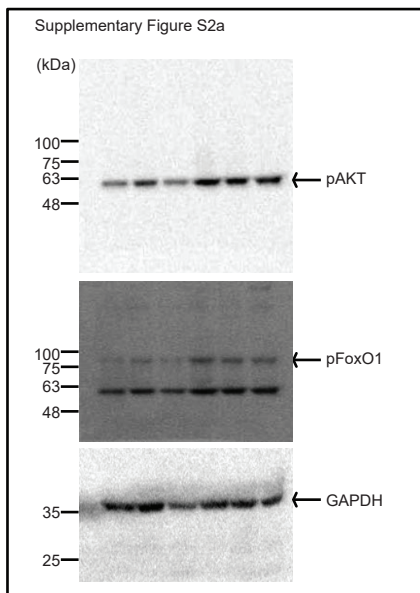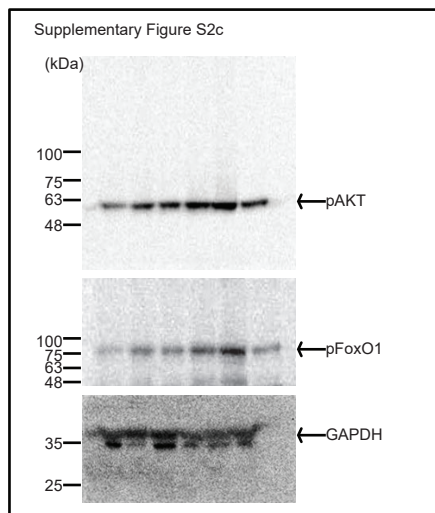

Supplement: 41598_2018_23298_MOESM1_ESM.pdf [file 41598_2018_23298_MOESM1_ESM.pdf]
